# Supplementary material for: Development of a comprehensive noninvasive prenatal test
Source: PubMed Central journal article supplement (PMC6136382; doi:10.1590/1678-4685-gmb-2017-0177), 2018-07-16
Supplement: 1415-4757-GMB-1678-4685-GMB-2017-0177-suppl1.pdf [file 1415-4757-GMB-1678-4685-GMB-2017-0177-suppl1.pdf]

## Supplementary Material to “Development of a comprehensive noninvasive prenatal test”

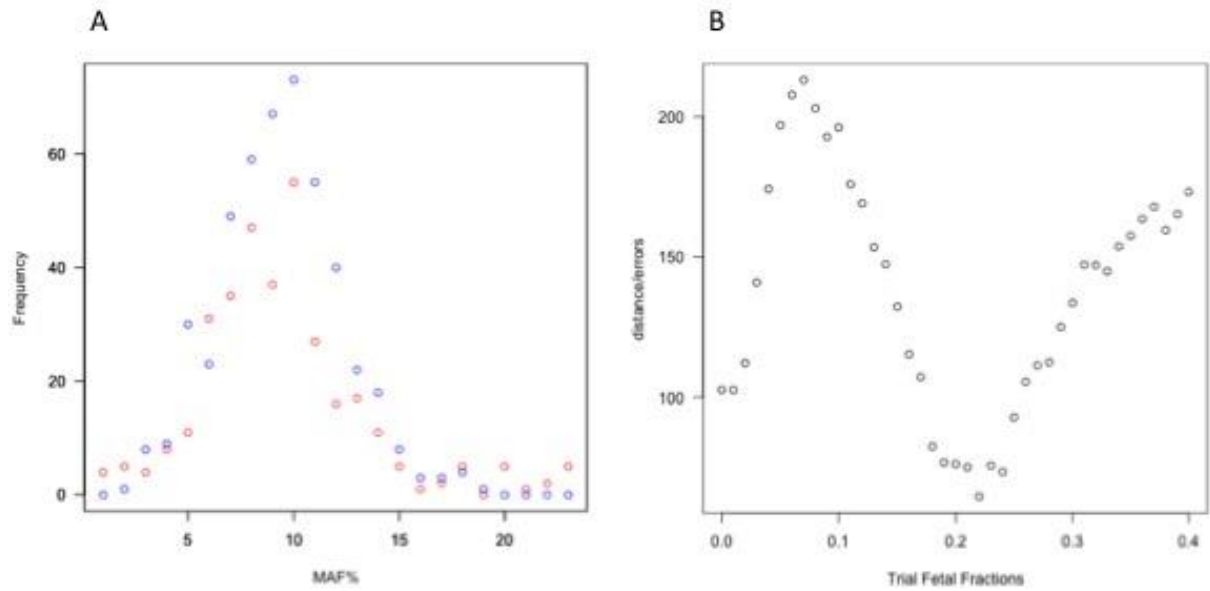

**Figure S1** - Fit procedure for FF estimation. A) Distribution of MAF values for both test and simulated samples; Red: test sample; Blue: fitted simulated sample (most similar to the test sample). B) Fitting of the test sample to the closest simulated samples.
