# Supplementary material for: Development of a comprehensive noninvasive prenatal test
Source: PubMed Central journal article supplement (PMC6136382; doi:10.1590/1678-4685-gmb-2017-0177), 2018-07-16
Supplement: 1415-4757-GMB-1678-4685-GMB-2017-0177-suppl2.pdf [file 1415-4757-GMB-1678-4685-GMB-2017-0177-suppl2.pdf]

## Supplementary Material to “Development of a comprehensive noninvasive prenatal test”

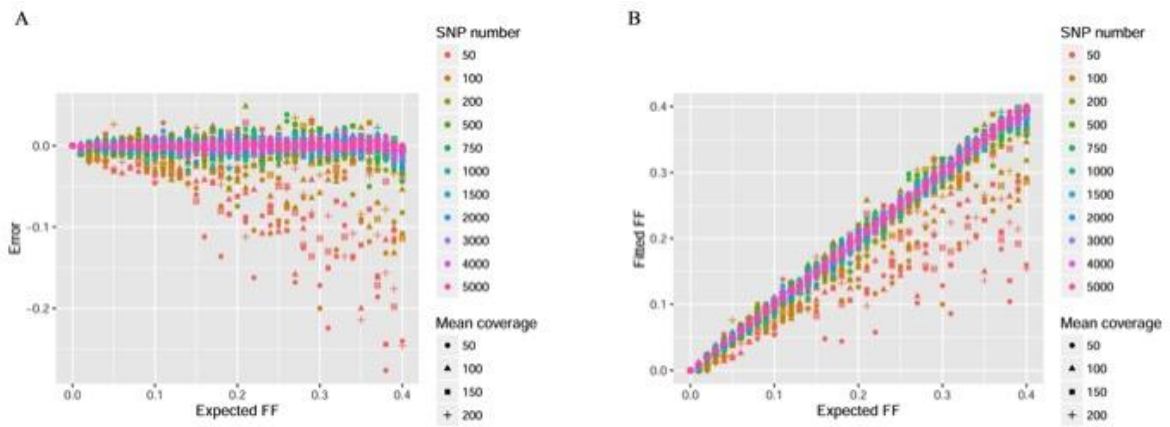

**Figure S2** - Evaluation of the model according to different fetal fractions (FF). A) Evaluation of the fitting according to different mean coverage and SNP number. B) Error (Fitted - Expected) according to different mean coverage and SNP number. Shape and color incorporate both mean coverage and SNP number values, respectively.
