# Supplementary material for: Development of a comprehensive noninvasive prenatal test
Source: PubMed Central journal article supplement (PMC6136382; doi:10.1590/1678-4685-gmb-2017-0177), 2018-07-16
Supplement: 1415-4757-GMB-1678-4685-GMB-2017-0177-suppl3.pdf [file 1415-4757-GMB-1678-4685-GMB-2017-0177-suppl3.pdf]

## Supplementary Material to “Development of a comprehensive noninvasive prenatal test”

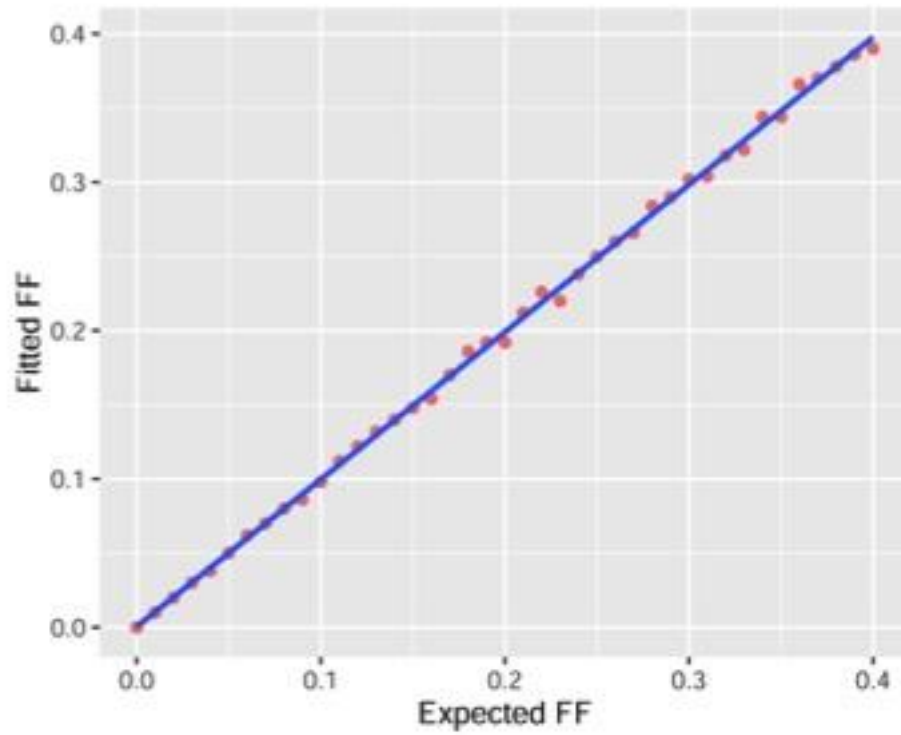

**Figure S3** - Evaluation of the fitting for mean coverage value = 150X and SNP numbers = 2000. Shape and color incorporate both mean coverage and SNP number values, respectively
