# Supplementary material for: Development of a comprehensive noninvasive prenatal test
Source: PubMed Central journal article supplement (PMC6136382; doi:10.1590/1678-4685-gmb-2017-0177), 2018-07-16
Supplement: 1415-4757-GMB-1678-4685-GMB-2017-0177-suppl4.pdf [file 1415-4757-GMB-1678-4685-GMB-2017-0177-suppl4.pdf]

## Supplementary Material to “Development of a comprehensive noninvasive prenatal test”

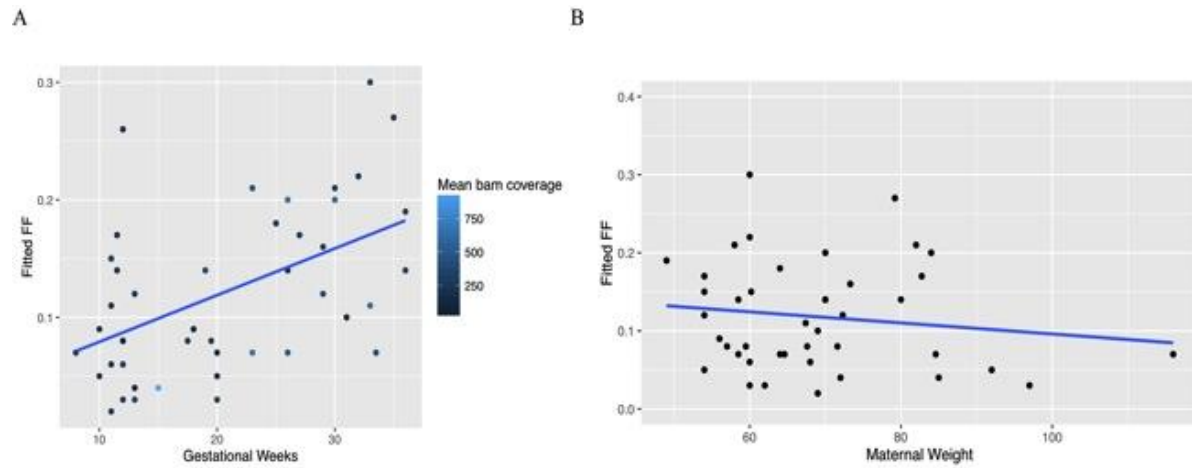

**Figure S4** – Correlations. A) Correlation between gestational week and fetal fraction. B) Correlation between fetal fraction and maternal weight (kg).
