# Supplementary material for: Development of a comprehensive noninvasive prenatal test
Source: PubMed Central journal article supplement (PMC6136382; doi:10.1590/1678-4685-gmb-2017-0177), 2018-07-16
Supplement: 1415-4757-GMB-1678-4685-GMB-2017-0177-suppl5.pdf [file 1415-4757-GMB-1678-4685-GMB-2017-0177-suppl5.pdf]

## Supplementary Material to “Development of a comprehensive noninvasive prenatal test”

**Table S1** - Genes present on the clinical gene panel.

| Genes           |                |                |                |               |                |               |                |                 |                  |
|-----------------|----------------|----------------|----------------|---------------|----------------|---------------|----------------|-----------------|------------------|
| <i>AARS</i>     | <i>CACNA1S</i> | <i>CRYAA</i>   | <i>FANCF</i>   | <i>GNAI3</i>  | <i>MAP2K1</i>  | <i>NBN</i>    | <i>POLR1D</i>  | <i>SALL1</i>    | <i>TCF12</i>     |
| <i>ABCD1</i>    | <i>CANT1</i>   | <i>CRYAB</i>   | <i>FANCG</i>   | <i>GNAS</i>   | <i>MATN3</i>   | <i>NDN</i>    | <i>POMGNT1</i> | <i>SATB2</i>    | <i>TCF4</i>      |
| <i>ACADM</i>    | <i>CAPN3</i>   | <i>CTDPI</i>   | <i>FBLN5</i>   | <i>GRHL3</i>  | <i>MBD2</i>    | <i>NDRG1</i>  | <i>POMT1</i>   | <i>SBDS</i>     | <i>TCOF1</i>     |
| <i>ACADVL</i>   | <i>CAV3</i>    | <i>CTNNB1</i>  | <i>FBN1</i>    | <i>GRIK1</i>  | <i>MBD5</i>    | <i>NDUFV2</i> | <i>POMT2</i>   | <i>SBF2</i>     | <i>TERT</i>      |
| <i>ACAT1</i>    | <i>CBS</i>     | <i>CTSK</i>    | <i>FECH</i>    | <i>HADHA</i>  | <i>MC2R</i>    | <i>NEFL</i>   | <i>POR</i>     | <i>SCN4A</i>    | <i>TFAP2A</i>    |
| <i>ACP5</i>     | <i>CCDC26</i>  | <i>CUBN</i>    | <i>FGD4</i>    | <i>HADHB</i>  | <i>MCCC1</i>   | <i>NF1</i>    | <i>POTED</i>   | <i>SCO2</i>     | <i>TG</i>        |
| <i>ACTA1</i>    | <i>CD3D</i>    | <i>CUL7</i>    | <i>FGF8</i>    | <i>HBB</i>    | <i>MCCC2</i>   | <i>NIPA1</i>  | <i>PPIB</i>    | <i>SEPNI</i>    | <i>TGFBR1</i>    |
| <i>ACTB</i>     | <i>CD3E</i>    | <i>CYP21A2</i> | <i>FGFR1</i>   | <i>HERC2</i>  | <i>MECP2</i>   | <i>NIPBL</i>  | <i>PQBP1</i>   | <i>SERPINH1</i> | <i>TGFBR2</i>    |
| <i>ACTG1</i>    | <i>CDH1</i>    | <i>CYP27A1</i> | <i>FGFR2</i>   | <i>HES7</i>   | <i>MED25</i>   | <i>NKX3-2</i> | <i>PRKARIA</i> | <i>SETBP1</i>   | <i>TGIF1</i>     |
| <i>ADA</i>      | <i>CDH2</i>    | <i>CYP7B1</i>  | <i>FGFR3</i>   | <i>HLCS</i>   | <i>MEGF10</i>  | <i>NOG</i>    | <i>PRPS1</i>   | <i>SETX</i>     | <i>TH</i>        |
| <i>ADAMTS18</i> | <i>CDH23</i>   | <i>DAG1</i>    | <i>FHL1</i>    | <i>HMGCL</i>  | <i>MEN1</i>    | <i>NOL8</i>   | <i>PRSS1</i>   | <i>SGCA</i>     | <i>TMC1</i>      |
| <i>ADAMTSL2</i> | <i>CDH7</i>    | <i>DBT</i>     | <i>FIG4</i>    | <i>HNRPDL</i> | <i>MESP2</i>   | <i>NOTCH3</i> | <i>PRX</i>     | <i>SGCB</i>     | <i>TMIE</i>      |
| <i>ADCK3</i>    | <i>CDH8</i>    | <i>DCLRE1C</i> | <i>FILIP1L</i> | <i>HRAS</i>   | <i>MFN2</i>    | <i>NPC1</i>   | <i>PSATI</i>   | <i>SGCD</i>     | <i>TMPRSS15</i>  |
| <i>AFG3L2</i>   | <i>CDK4</i>    | <i>DDR2</i>    | <i>FKBP10</i>  | <i>HSPB1</i>  | <i>MID1</i>    | <i>NPC2</i>   | <i>PSPH</i>    | <i>SGCG</i>     | <i>TMPRSS3</i>   |
| <i>ALDH3A2</i>  | <i>CDKL5</i>   | <i>DES</i>     | <i>FKBP14</i>  | <i>HSPB8</i>  | <i>MIR1205</i> | <i>NPR2</i>   | <i>PTCH1</i>   | <i>SH3BP2</i>   | <i>TNFRSF11A</i> |
| <i>ALDH7A1</i>  | <i>CDKN2A</i>  | <i>DFNB31</i>  | <i>FKRP</i>    | <i>IDUA</i>   | <i>MIR1206</i> | <i>NRAS</i>   | <i>PTEN</i>    | <i>SHANK3</i>   | <i>TP53</i>      |

| <b>Genes</b>    |                |                |                |                 |                |                 |                |                 |                |
|-----------------|----------------|----------------|----------------|-----------------|----------------|-----------------|----------------|-----------------|----------------|
| <i>ALPL</i>     | <i>CFL1</i>    | <i>DHCR24</i>  | <i>FKTN</i>    | <i>IFT80</i>    | <i>MIR1207</i> | <i>NSD1</i>     | <i>PTH1R</i>   | <i>SHH</i>      | <i>TP63</i>    |
| <i>ALX1</i>     | <i>CFTR</i>    | <i>DHCR7</i>   | <i>FLNA</i>    | <i>IL11RA</i>   | <i>MIR1208</i> | <i>NT5C3</i>    | <i>PTPN11</i>  | <i>SHOC2</i>    | <i>TPM2</i>    |
| <i>ALX3</i>     | <i>CHEK2</i>   | <i>DLAT</i>    | <i>FLNB</i>    | <i>IL2RG</i>    | <i>MIR140</i>  | <i>NTNG1</i>    | <i>PTS</i>     | <i>SHOX</i>     | <i>TPM3</i>    |
| <i>ALX4</i>     | <i>CHST14</i>  | <i>DLL3</i>    | <i>FLNC</i>    | <i>IL7R</i>     | <i>MIR200B</i> | <i>OFD1</i>     | <i>PVRL1</i>   | <i>SIX3</i>     | <i>TPO</i>     |
| <i>AMN</i>      | <i>CHST3</i>   | <i>DMD</i>     | <i>FMRI</i>    | <i>IRF6</i>     | <i>MLH1</i>    | <i>OGN</i>      | <i>PVT1</i>    | <i>SLC17A6</i>  | <i>TRAPPC2</i> |
| <i>ANO5</i>     | <i>CLCN1</i>   | <i>DNAJB6</i>  | <i>FOLR1</i>   | <i>ITGA7</i>    | <i>MMAA</i>    | <i>OTC</i>      | <i>PYGM</i>    | <i>SLC19A3</i>  | <i>TRIM32</i>  |
| <i>APC</i>      | <i>CLDN14</i>  | <i>DNM2</i>    | <i>FOXE1</i>   | <i>IVD</i>      | <i>MMAB</i>    | <i>OTOF</i>     | <i>QDPR</i>    | <i>SLC22A5</i>  | <i>TRIP11</i>  |
| <i>APTX</i>     | <i>CLPTMIL</i> | <i>DUOX2</i>   | <i>FOXG1</i>   | <i>JAG1</i>     | <i>MMACHC</i>  | <i>OXCT1</i>    | <i>RAB23</i>   | <i>SLC25A13</i> | <i>TRPC6</i>   |
| <i>ARG1</i>     | <i>CLRN1</i>   | <i>DYM</i>     | <i>FOXP2</i>   | <i>JAK3</i>     | <i>MMADHC</i>  | <i>PABPN1</i>   | <i>RAB7A</i>   | <i>SLC25A15</i> | <i>TRPS1</i>   |
| <i>ARHGAP29</i> | <i>CNTNAP2</i> | <i>DYNC2H1</i> | <i>FTCD</i>    | <i>JAM2</i>     | <i>MMP13</i>   | <i>PAFAH1B1</i> | <i>RABEP2</i>  | <i>SLC26A2</i>  | <i>TRPV4</i>   |
| <i>ARX</i>      | <i>COL10A1</i> | <i>DYRK1A</i>  | <i>FUS</i>     | <i>KATNAL2</i>  | <i>MMP9</i>    | <i>PAH</i>      | <i>RAD50</i>   | <i>SLC26A4</i>  | <i>TSC1</i>    |
| <i>ASL</i>      | <i>COL11A1</i> | <i>DYSF</i>    | <i>FXN</i>     | <i>KBTD13</i>   | <i>MOCS1</i>   | <i>PALB2</i>    | <i>RAD51</i>   | <i>SLC2A1</i>   | <i>TSC2</i>    |
| <i>ASPA</i>     | <i>COL11A2</i> | <i>EDN1</i>    | <i>GADD45G</i> | <i>KCNE1</i>    | <i>MOCS2</i>   | <i>PAPSS2</i>   | <i>RAD51C</i>  | <i>SLC5A5</i>   | <i>TSHB</i>    |
| <i>ASS1</i>     | <i>COL18A1</i> | <i>EFNB1</i>   | <i>GALNS</i>   | <i>KIAA1267</i> | <i>MPZ</i>     | <i>PAX8</i>     | <i>RAD51D</i>  | <i>SMAD4</i>    | <i>TSHR</i>    |
| <i>ATLI</i>     | <i>COL1A1</i>  | <i>EGR2</i>    | <i>GALNT1</i>  | <i>KIF22</i>    | <i>MRAP</i>    | <i>PCBD1</i>    | <i>RAD51L3</i> | <i>SMARCAL1</i> | <i>TSHZ1</i>   |
| <i>ATM</i>      | <i>COL1A2</i>  | <i>EIF2AK3</i> | <i>GALNT12</i> | <i>KIF5A</i>    | <i>MRE11A</i>  | <i>PCCA</i>     | <i>RAF1</i>    | <i>SNAP29</i>   | <i>TSPEAR</i>  |
| <i>ATP7A</i>    | <i>COL2A1</i>  | <i>EIF4A3</i>  | <i>GALT</i>    | <i>KRAS</i>     | <i>MSH2</i>    | <i>PCCB</i>     | <i>RAG1</i>    | <i>SNRPN</i>    | <i>TWIST1</i>  |
| <i>ATP7B</i>    | <i>COL3A1</i>  | <i>ELN</i>     | <i>GAMT</i>    | <i>L1CAM</i>    | <i>MSH3</i>    | <i>PCDH15</i>   | <i>RAG2</i>    | <i>SOD1</i>     | <i>UBE3A</i>   |
| <i>ATR</i>      | <i>COL5A1</i>  | <i>EMD</i>     | <i>GARS</i>    | <i>LAMA2</i>    | <i>MSH6</i>    | <i>PDGFRA</i>   | <i>RAI1</i>    | <i>SOS1</i>     | <i>USH1C</i>   |

| <b>Genes</b>    |                 |               |              |               |              |               |               |               |               |
|-----------------|-----------------|---------------|--------------|---------------|--------------|---------------|---------------|---------------|---------------|
| <i>AXIN2</i>    | <i>COL5A2</i>   | <i>EPCAM</i>  | <i>GATM</i>  | <i>LAMP2</i>  | <i>MSTN</i>  | <i>PDHA1</i>  | <i>RARA</i>   | <i>SOS2</i>   | <i>USH1G</i>  |
| <i>B4GALT6</i>  | <i>COL6A1</i>   | <i>EPHA3</i>  | <i>GCDH</i>  | <i>LARGE</i>  | <i>MSX1</i>  | <i>PDHX</i>   | <i>RBBP8</i>  | <i>SOST</i>   | <i>USH2A</i>  |
| <i>BAP1</i>     | <i>COL6A2</i>   | <i>ERF</i>    | <i>GCH1</i>  | <i>LEMD3</i>  | <i>MSX2</i>  | <i>PDSSI</i>  | <i>RECQL4</i> | <i>SOX9</i>   | <i>USH2A</i>  |
| <i>BARD1</i>    | <i>COL6A3</i>   | <i>ERG</i>    | <i>GDAP1</i> | <i>LEPRE1</i> | <i>MTHFR</i> | <i>PDSS2</i>  | <i>REEP1</i>  | <i>SP7</i>    | <i>USHBP1</i> |
| <i>BCKDHA</i>   | <i>COL9A1</i>   | <i>ETHE1</i>  | <i>GDF5</i>  | <i>LFNG</i>   | <i>MTM1</i>  | <i>PFKL</i>   | <i>RET</i>    | <i>SPAST</i>  | <i>USP25</i>  |
| <i>BCKDHB</i>   | <i>COL9A2</i>   | <i>EVC</i>    | <i>GDF6</i>  | <i>LIFR</i>   | <i>MTMR2</i> | <i>PHF8</i>   | <i>RGMA</i>   | <i>SPG11</i>  | <i>VAPB</i>   |
| <i>BIN1</i>     | <i>COL9A3</i>   | <i>EVC2</i>   | <i>GIF</i>   | <i>LIPI</i>   | <i>MTR</i>   | <i>PHGDH</i>  | <i>RHD</i>    | <i>SPG7</i>   | <i>VHL</i>    |
| <i>BMP4</i>     | <i>COMP</i>     | <i>EXO1</i>   | <i>GJA1</i>  | <i>LITAF</i>  | <i>MTRR</i>  | <i>PLCB4</i>  | <i>RIT1</i>   | <i>SPR</i>    | <i>WNT3</i>   |
| <i>BMPRIA</i>   | <i>COQ2</i>     | <i>EXT1</i>   | <i>GJB1</i>  | <i>LMAN1</i>  | <i>MUT</i>   | <i>PLEC</i>   | <i>RMRP</i>   | <i>SRY</i>    | <i>XRCC3</i>  |
| <i>BRAF</i>     | <i>COQ9</i>     | <i>FAF1</i>   | <i>GJB2</i>  | <i>LMBRD1</i> | <i>MUTYH</i> | <i>PLOD1</i>  | <i>ROR2</i>   | <i>STK11</i>  | <i>ZAP70</i>  |
| <i>BRCA1</i>    | <i>CP</i>       | <i>FAH</i>    | <i>GJB3</i>  | <i>LMNA</i>   | <i>MYC</i>   | <i>PMP22</i>  | <i>RPS27L</i> | <i>SUMO1</i>  | <i>ZIC2</i>   |
| <i>BRCA2</i>    | <i>CPS1</i>     | <i>FANCA</i>  | <i>GJB6</i>  | <i>LRP5</i>   | <i>MYO6</i>  | <i>PMS1</i>   | <i>RTTN</i>   | <i>TARDBP</i> |               |
| <i>BRIP1</i>    | <i>CREBBP</i>   | <i>FANCC</i>  | <i>GLB1</i>  | <i>LRSAM1</i> | <i>MYO7A</i> | <i>PMS2</i>   | <i>RUNX1</i>  | <i>TBX1</i>   |               |
| <i>BTD</i>      | <i>CRISPLD2</i> | <i>FANCD2</i> | <i>GLI2</i>  | <i>LTBP4</i>  | <i>MYOT</i>  | <i>POGZ</i>   | <i>RUNX2</i>  | <i>TBX22</i>  |               |
| <i>C21orf29</i> | <i>CRTAP</i>    | <i>FANCE</i>  | <i>GLI3</i>  | <i>LZTR1</i>  | <i>NAGS</i>  | <i>POLR1C</i> | <i>RYR1</i>   | <i>TCAP</i>   |               |
