# Supplementary material for: Development of a comprehensive noninvasive prenatal test
Source: PubMed Central journal article supplement (PMC6136382; doi:10.1590/1678-4685-gmb-2017-0177), 2018-07-16
Supplement: 1415-4757-GMB-1678-4685-GMB-2017-0177-suppl6.pdf [file 1415-4757-GMB-1678-4685-GMB-2017-0177-suppl6.pdf]

## Supplementary Material to “Development of a comprehensive noninvasive prenatal test”

**Table S2** - Genes for dysplasia/craniofacial disorders present in the clinical panel.

| <b>Genes</b>    |                |                |               |               |               |                |                 |                  |               |
|-----------------|----------------|----------------|---------------|---------------|---------------|----------------|-----------------|------------------|---------------|
| <i>ACP5</i>     | <i>COL18A1</i> | <i>DLL3</i>    | <i>FGFR1</i>  | <i>GNAI3</i>  | <i>LRP5</i>   | <i>PLS3</i>    | <i>SATB2</i>    | <i>TBX22</i>     | <i>TSHZ1</i>  |
| <i>ADAMTS18</i> | <i>COL1A1</i>  | <i>DYM</i>     | <i>FGFR2</i>  | <i>GNAS</i>   | <i>MATN3</i>  | <i>POLR1C</i>  | <i>SBDS</i>     | <i>TBX6</i>      | <i>TWIST1</i> |
| <i>ADAMTSL2</i> | <i>COL1A2</i>  | <i>DYNC2H1</i> | <i>FGFR3</i>  | <i>GRHL3</i>  | <i>MESP2</i>  | <i>POLR1D</i>  | <i>SERPINF1</i> | <i>TCF12</i>     | <i>WNT1</i>   |
| <i>ALPL</i>     | <i>COL2A1</i>  | <i>EDN1</i>    | <i>FIG4</i>   | <i>HES7</i>   | <i>MMP13</i>  | <i>POR</i>     | <i>SERPINH1</i> | <i>TCOF1</i>     | <i>WNT3</i>   |
| <i>ALX1</i>     | <i>COL3A1</i>  | <i>EFNB1</i>   | <i>FKBP10</i> | <i>HUWE1</i>  | <i>MMP9</i>   | <i>PPIB</i>    | <i>SH3BP2</i>   | <i>TFAP2A</i>    | <i>ZIC1</i>   |
| <i>ALX3</i>     | <i>COL5A1</i>  | <i>EIF2AK3</i> | <i>FKBP14</i> | <i>IFITM5</i> | <i>MSX1</i>   | <i>PRKARIA</i> | <i>SHH</i>      | <i>TGFBR1</i>    | <i>ZIC2</i>   |
| <i>ALX4</i>     | <i>COL5A2</i>  | <i>EIF4A3</i>  | <i>FLNA</i>   | <i>IFT80</i>  | <i>MSX2</i>   | <i>PTCH1</i>   | <i>SHOX</i>     | <i>TGFBR2</i>    |               |
| <i>ANO5</i>     | <i>COL9A1</i>  | <i>ELN</i>     | <i>FLNB</i>   | <i>IL11RA</i> | <i>NKX3-2</i> | <i>PTH1R</i>   | <i>SIX3</i>     | <i>TGIF1</i>     |               |
| <i>BMP1</i>     | <i>COL9A2</i>  | <i>ERF</i>     | <i>GALNS</i>  | <i>IRF6</i>   | <i>NOG</i>    | <i>PVRL1</i>   | <i>SLC26A2</i>  | <i>TMEM38B</i>   |               |
| <i>CANT1</i>    | <i>COL9A3</i>  | <i>EVC</i>     | <i>GDF5</i>   | <i>KIF22</i>  | <i>NPR2</i>   | <i>RAB23</i>   | <i>SMARCAL1</i> | <i>TNFRSF11A</i> |               |
| <i>CHST14</i>   | <i>COMP</i>    | <i>EVC2</i>    | <i>GDF6</i>   | <i>LEMD3</i>  | <i>OFD1</i>   | <i>RECQL4</i>  | <i>SOST</i>     | <i>TP63</i>      |               |
| <i>CHST3</i>    | <i>CREB3L1</i> | <i>EXT1</i>    | <i>GJA1</i>   | <i>LEPRE1</i> | <i>PAPSS2</i> | <i>RMRP</i>    | <i>SOX9</i>     | <i>TRAPPC2</i>   |               |
| <i>COL10A1</i>  | <i>CRTAP</i>   | <i>FBLN5</i>   | <i>GLB1</i>   | <i>LFNG</i>   | <i>PLCB4</i>  | <i>ROR2</i>    | <i>SP7</i>      | <i>TRIP11</i>    |               |
| <i>COL11A1</i>  | <i>CTSK</i>    | <i>FBN1</i>    | <i>GLI2</i>   | <i>LIFR</i>   | <i>PLOD1</i>  | <i>RUNX2</i>   | <i>SPARC</i>    | <i>TRPS1</i>     |               |
| <i>COL11A2</i>  | <i>DDR2</i>    | <i>FGF8</i>    | <i>GLI3</i>   | <i>LMNA</i>   | <i>PLOD2</i>  | <i>SALL1</i>   | <i>TBX1</i>     | <i>TRPV4</i>     |               |
