# Supplementary material for: Development of a comprehensive noninvasive prenatal test
Source: PubMed Central journal article supplement (PMC6136382; doi:10.1590/1678-4685-gmb-2017-0177), 2018-07-16
Supplement: 1415-4757-GMB-1678-4685-GMB-2017-0177-suppl7.pdf [file 1415-4757-GMB-1678-4685-GMB-2017-0177-suppl7.pdf]

## Supplementary Material to “Development of a comprehensive noninvasive prenatal test”

**Table S3** - Summary of pregnant samples.

| Sample  | Trisomy | Seq <sup>1</sup> | Fetal sex <sup>2</sup> | Maternal age (years) | GW <sup>3</sup> | Mean bam coverage (X) | Mean SNP number | Fitted FF | Stdev FF | ChrY prop | ChrY Z-score | Chr21 prop | Chr21 Z-score |
|---------|---------|------------------|------------------------|----------------------|-----------------|-----------------------|-----------------|-----------|----------|-----------|--------------|------------|---------------|
| P2183   | Not-T21 | HiSeq            | Male                   | 33                   | 19              | 357.4                 | 3974            | 0.14      | 0.006    | 5.57E-05  | 90.48        | 0.033770   | -0.166        |
| P2182   | Not-T21 | MiSeq            | Male                   | 35                   | 27              | 208.6                 | 4968            | 0.17      | 0.006    | 7.75E-05  | 164.50       | 0.034113   | 0.414         |
| F9940-1 | Not-T21 | MiSeq            | Male                   | 37                   | 11.5            | 141.2                 | 3757            | 0.17      | 0.010    | 6.33E-05  | 134.21       | 0.034034   | 0.181         |
| F9914-1 | Not-T21 | MiSeq            | Female                 | 35                   | 13              | 219.1                 | 4813            | 0.12      | 0.006    | 7.11E-07  | 0.70         | 0.034490   | 1.533         |
| F9892-1 | Not-T21 | MiSeq            | Male                   | 35                   | 12              | 244.2                 | 5239            | 0.06      | 0.012    | 3.32E-05  | 70.01        | 0.034388   | 1.230         |
| F9891-1 | Not-T21 | MiSeq            | Male                   | 32                   | 20              | 269.7                 | 4620            | 0.03      | 0.006    | 4.45E-05  | 94.11        | 0.033715   | -0.766        |
| F9614-1 | Not-T21 | MiSeq            | Female                 | 32                   | 12              | 39.99                 | 11              | 0.08      | 0.040    | 0         | -0.81        | 0.033771   | -0.600        |
| F9531-1 | Not-T21 | MiSeq            | Male                   | 36                   | 20              | 97.65                 | 2999            | 0.05      | 0.006    | 1.77E-05  | 36.94        | 0.034206   | 0.689         |
| F9530-1 | Not-T21 | MiSeq            | Female                 | 37                   | 11              | 226.9                 | 4213            | 0.02      | 0.006    | 5.78E-07  | 0.42         | 0.033758   | -0.638        |
| F9269-1 | Not-T21 | MiSeq            | Male                   | 46                   | 10              | 186.9                 | 3862            | 0.05      | 0.021    | 3.48E-    | 73.42        | 0.03396    | -0.019        |

| Sample  | Trisomy | Seq <sup>1</sup> | Fetal sex <sup>2</sup> | Maternal age (years) | GW <sup>3</sup> | Mean bam coverage (X) | Mean SNP number | Fitted FF | Stdev FF | ChrY prop | ChrY Z-score | Chr21 prop | Chr21 Z-score |
|---------|---------|------------------|------------------------|----------------------|-----------------|-----------------------|-----------------|-----------|----------|-----------|--------------|------------|---------------|
|         |         |                  |                        |                      |                 |                       |                 |           |          | 05        |              | 7          |               |
| F9198-1 | Not-T21 | MiSeq            | Female                 | 34                   | 17.5            | 222                   | 4404            | 0.08      | 0.006    | 1.37E-06  | 2.11         | 0.033937   | -0.108        |
| F9176-1 | Not-T21 | MiSeq            | Female                 | 30                   | 11.5            | 173.6                 | 3875            | 0.14      | 0.000    | 7.83E-07  | 0.86         | 0.033825   | -0.438        |
| F9151-1 | Not-T21 | MiSeq            | Female                 | 35                   | 31              | 80.04                 | 1906            | 0.1       | 0.015    | 0         | -0.81        | 0.033727   | -0.728        |
| F9051-1 | Not-T21 | MiSeq            | Female                 | 35                   | 11              | 271.6                 | 4584            | 0.15      | 0.006    | 0         | -0.81        | 0.034120   | 0.435         |
| F8998-1 | Not-T21 | MiSeq            | Male                   | 21                   | 26              | 161.1                 | 3707            | 0.14      | 0.006    | 6.20E-05  | 131.44       | 0.033245   | -2.158        |
| F8850-1 | Not-T21 | MiSeq            | Female                 | 44                   | 11              | 203.9                 | 4222            | 0.11      | 0.000    | 0         | -0.81        | 0.033693   | -0.831        |
| F8775-1 | Not-T21 | MiSeq            | NA                     | 37                   | 18              | 62.71                 | 234             | 0.09      | 0.045    | 2.53E-05  | 53.15        | 0.033545   | -1.267        |
| F8762-1 | Not-T21 | MiSeq            | Female                 | 38                   | 10              | 147.2                 | 3373            | 0.09      | 0.012    | 0         | -0.81        | 0.034311   | 1.002         |
| F8660-1 | Not-T21 | MiSeq            | Female                 | 35                   | 13              | 294.3                 | 4647            | 0.03      | 0.006    | 5.41E-07  | 0.34         | 0.034427   | 1.347         |
| F8659-1 | Not-T21 | MiSeq            | Female                 | 36                   | 12              | 233.1                 | 4375            | 0.03      | 0.000    | 6.05E-06  | 12.09        | 0.034203   | 0.683         |
| F8642-1 | Not-T21 | MiSeq            | Female                 | 39                   | 11              | 162.1                 | 5355            | 0.06      | 0.010    | 0         | -0.81        | 0.033795   | -0.529        |

| Sample   | Trisomy | Seq <sup>1</sup> | Fetal sex <sup>2</sup> | Maternal age (years) | GW <sup>3</sup> | Mean bam coverage (X) | Mean SNP number | Fitted FF | Stdev FF | ChrY prop | ChrY Z-score | Chr21 prop | Chr21 Z-score |
|----------|---------|------------------|------------------------|----------------------|-----------------|-----------------------|-----------------|-----------|----------|-----------|--------------|------------|---------------|
| F8626-1  | Not-T21 | MiSeq            | NA                     | 27                   | 12              | 132.2                 | 4590            | 0.26      | 0.006    | 6.06E-05  | 128.45       | 0.034139   | 0.492         |
| F8614-1  | Not-T21 | MiSeq            | Male                   | 29                   | 13              | 66.12                 | 362             | 0.04      | 0.010    | 1.27E-05  | 26.28        | 0.033946   | -0.079        |
| F11247-1 | Not-T21 | HiSeq            | Female                 | 30                   | 26              | 620.6                 | 4188            | 0.13      | 0.006    | 2.42E-07  | -0.66        | 0.033613   | -0.803        |
| F11091-1 | NA      | HiSeq            | NA                     | 35                   | 15              | 928.38                | 4327            | 0.04      | 0.010    | 2.47E-05  | 39.53        | 0.033861   | 0.208         |
| F11077-1 | Not-T21 | HiSeq            | Female                 | 20                   | 23              | 641.7                 | 4201            | 0.07      | 0.006    | 1.11E-06  | 0.77         | 0.033519   | -1.187        |
| F10951-1 | Not-T21 | HiSeq            | Female                 | 23                   | 33.5            | 374.7                 | 4070            | 0.07      | 0.000    | 2.09E-06  | 2.38         | 0.033469   | -1.392        |
| F10855-1 | Not-T21 | HiSeq            | Male                   | 36                   | 23              | 418.3                 | 4018            | 0.21      | 0.000    | 9.97E-05  | 162.78       | 0.034197   | 1.573         |
| F10795-1 | Not-T21 | HiSeq            | Female                 | 31                   | 12              | 541.4                 | 4038            | 0.08      | 0.000    | 2.47E-07  | -0.65        | 0.034120   | 1.262         |
| F10775-1 | Not-T21 | HiSeq            | Male                   | 27                   | 29              | 356.5                 | 4009            | 0.12      | 0.000    | 4.92E-05  | 79.80        | 0.033566   | -0.996        |
| F10774-1 | Not-T21 | HiSeq            | Male                   | 22                   | 33              | 592                   | 4235            | 0.11      | 0.006    | 4.80E-05  | 77.82        | 0.033688   | -0.500        |
| F10764-1 | Not-T21 | HiSeq            | Female                 | 26                   | 26              | 463.8                 | 4002            | 0.07      | 0.000    | 4.23E-07  | -0.36        | 0.033773   | -0.154        |
| F10609-1 | Not-T21 | HiSeq            | NA                     | 34                   | 30              | 556.3                 | 4134            | 0.2       | 0.006    | 1.13E-    | 0.80         | 0.03350    | -1.231        |

| Sample   | Trisomy | Seq <sup>1</sup> | Fetal sex <sup>2</sup> | Maternal age (years) | GW <sup>3</sup> | Mean bam coverage (X) | Mean SNP number | Fitted FF | Stdev FF | ChrY prop  | ChrY Z-score | Chr21 prop | Chr21 Z-score |
|----------|---------|------------------|------------------------|----------------------|-----------------|-----------------------|-----------------|-----------|----------|------------|--------------|------------|---------------|
|          |         |                  |                        |                      |                 |                       |                 |           |          | 06         |              | 8          |               |
| F10396-1 | Not-T21 | MiSeq            | Male                   | 40                   | 36              | 267.9                 | 4656            | 0.19      | 0.162    | 0.00017827 | 379.45       | 0.036096   | 6.292         |
| F10351-1 | Not-T21 | MiSeq            | Female                 | 32                   | 33              | 283.3                 | 5166            | 0.3       | 0.012    | 2.83E-07   | -0.21        | 0.034921   | 2.810         |
| F10177-2 | Not-T21 | MiSeq            | Female                 | 20                   | 32              | 194.2                 | 4814            | 0.22      | 0.010    | 8.26E-07   | 0.95         | 0.033631   | -1.014        |
| F10157-1 | Not-T21 | MiSeq            | Female                 | 39                   | 29              | 242.4                 | 5066            | 0.16      | 0.010    | 0          | -0.81        | 0.034663   | 2.046         |
| F10138-1 | Not-T21 | MiSeq            | Male                   | 33                   | 25              | 210.2                 | 4188            | 0.18      | 0.006    | 0.00010868 | 231.01       | 0.033973   | 0.001         |
| F10117-1 | Not-T21 | MiSeq            | Female                 | 25                   | 30              | 233.6                 | 4356            | 0.21      | 0.000    | 6.19E-07   | 0.51         | 0.034212   | 0.710         |
| F10113-1 | Not-T21 | MiSeq            | Male                   | 34                   | 35              | 212.5                 | 4898            | 0.27      | 0.006    | 0.00013179 | 280.30       | 0.034049   | 0.226         |
| F10063-1 | Not-T21 | MiSeq            | Female                 | 30                   | 19.5            | 253.2                 | 5258            | 0.08      | 0.000    | 6.29E-07   | 0.53         | 0.034390   | 1.237         |
| C26729   | Not-T21 | MiSeq            | Male                   | 28                   | 20              | 105.6                 | 2176            | 0.07      | 0.000    | 4.93E-05   | 104.35       | 0.033574   | -1.183        |
| C26139   | Not-T21 | MiSeq            | Female                 | 35                   | 11              | 250.2                 | 5085            | 0.15      | 0.010    | 6.33E-07   | 0.54         | 0.034600   | 1.857         |
| C24778   | NA      | HiSeq            | Male                   | 33                   | 8               | 201.6                 | 3514            | 0.07      | 0.000    | 2.55E-05   | 40.85        | 0.034027   | 0.884         |

---

| Sample | Trisomy | Seq <sup>1</sup> | Fetal sex <sup>2</sup> | Maternal age (years) | GW <sup>3</sup> | Mean bam coverage (X) | Mean SNP number | Fitted FF | Stdev FF | ChrY prop | ChrY Z-score | Chr21 prop | Chr21 Z-score |
|--------|---------|------------------|------------------------|----------------------|-----------------|-----------------------|-----------------|-----------|----------|-----------|--------------|------------|---------------|
| C18177 | Not-T21 | MiSeq            | Female                 | 25                   | 36              | 269.9                 | 4367            | 0.14      | 0.000    | 0         | -0.81        | 0.03428    | 0.936         |

---

<sup>1</sup>Seq: Sequencing platform used.

<sup>2</sup>NA: information not available.

<sup>3</sup>GW: gestational weeks.
