# Supplementary material for: Development of a comprehensive noninvasive prenatal test
Source: PubMed Central journal article supplement (PMC6136382; doi:10.1590/1678-4685-gmb-2017-0177), 2018-07-16
Supplement: 1415-4757-GMB-1678-4685-GMB-2017-0177-suppl8.pdf [file 1415-4757-GMB-1678-4685-GMB-2017-0177-suppl8.pdf]

## Supplementary Material to “Development of a comprehensive noninvasive prenatal test”

**Table S4** - Summary of non-pregnant individuals.

| Sample   | Relationship | Seq <sup>1</sup> | Trisomy | Gender | Mean bam coverage (X) | Mean SNP number | Expected FF | Fitted FF |
|----------|--------------|------------------|---------|--------|-----------------------|-----------------|-------------|-----------|
| F9966-1  | Child        | MiSeq            | T21     | Female | 198.6                 | 3866            | 0           | 0         |
| F9966-2  | Mother       | MiSeq            | Not-T21 | Female | 243                   | 4589            | 0           | 0         |
| F9219-1  | Child        | MiSeq            | Not-T21 | Female | 186.8                 | 5413            | 0           | 0         |
| F9219-2  | Mother       | MiSeq            | Not-T21 | Female | 156.6                 | 4997            | 0           | 0         |
| F10801-1 | Child        | HiSeq            | Not-T21 | Female | 722.1                 | 4105            | 0           | 0.01      |
| F10801-2 | Mother       | HiSeq            | Not-T21 | Female | 504.1                 | 4171            | 0           | 0.02      |
| F10114-1 | Child        | MiSeq            | T21     | Female | 184.5                 | 3867            | 0           | 0         |
| F10114-2 | Mother       | MiSeq            | Not-T21 | Female | 261.4                 | 4445            | 0           | 0         |
| C26449   | Child        | MiSeq            | Not-T21 | Male   | 223.4                 | 4180            | 0           | 0.01      |
| C26450   | Mother       | MiSeq            | Not-T21 | Female | 265.3                 | 4578            | 0           | 0         |
| C25147   | Child        | MiSeq            | Not-T21 | Male   | 215                   | 4364            | 0           | 0.01      |
| C25148   | Mother       | MiSeq            | Not-T21 | Female | 173                   | 3902            | 0           | 0.01      |
| C23944   | Child        | MiSeq            | Not-T21 | Male   | 92.85                 | 2573            | 0           | 0.01      |
| C23945   | Mother       | MiSeq            | Not-T21 | Female | 84.55                 | 1873            | 0           | 0.01      |
| C20598   | Child        | MiSeq            | Not-T21 | Male   | 209.7                 | 4204            | 0           | 0.01      |
| C20672   | Mother       | MiSeq            | Not-T21 | Female | 145.7                 | 3437            | 0           | 0.04      |

<sup>1</sup>Seq: Sequencing platform used.
