# Supplementary material for: Development of a comprehensive noninvasive prenatal test
Source: PubMed Central journal article supplement (PMC6136382; doi:10.1590/1678-4685-gmb-2017-0177), 2018-07-16
Supplement: 1415-4757-GMB-1678-4685-GMB-2017-0177-suppl9.pdf [file 1415-4757-GMB-1678-4685-GMB-2017-0177-suppl9.pdf]

### Supplementary Material to “Development of a comprehensive noninvasive prenatal test”

**Table S5** - Summary of mock samples.

| Sample <sup>1</sup> | Seq <sup>2</sup> | Trisomy | Fetal sex | Mean bam coverage (X) | Mean SNP number | Expected FF <sup>3</sup> | Fitted FF | Stdev FF | ChrY prop | ChrY Z-score | Chr21 prop | Chr21 Z-score |
|---------------------|------------------|---------|-----------|-----------------------|-----------------|--------------------------|-----------|----------|-----------|--------------|------------|---------------|
| F9966_fetal4        | MiSeq            | T21     | Female    | 254.6                 | 4635            | 0.08                     | 0.07      | 0.006    | 0         | -0.81        | 0.035003   | 3.05          |
| F9966_fetal5        | MiSeq            | T21     | Female    | 257.8                 | 4652            | 0.09                     | 0.08      | 0        | 0         | -0.81        | 0.035300   | 3.93          |
| F9966_fetal10       | MiSeq            | T21     | Female    | 272.5                 | 4722            | 0.16                     | 0.16      | 0        | 0         | -0.81        | 0.036575   | 7.71          |
| F9966_fetal15       | MiSeq            | T21     | Female    | 285.4                 | 4754            | 0.22                     | 0.22      | 0.006    | 0         | -0.81        | 0.037542   | 10.58         |
| F9966_fetal20       | MiSeq            | T21     | Female    | 296.6                 | 4791            | 0.27                     | 0.28      | 0        | 0         | -0.81        | 0.038480   | 13.36         |
| F9219_fetal4        | MiSeq            | Not-T21 | Female    | 163.4                 | 5197            | 0.09                     | 0.09      | 0.01     | 0         | -0.81        | 0.033722   | -0.74         |
| F9219_fetal5        | MiSeq            | Not-T21 | Female    | 166.1                 | 5227            | 0.11                     | 0.11      | 0.006    | 0         | -0.81        | 0.033679   | -0.87         |
| F9219_f             | MiSeq            | Not-    | Female    | 177.8                 | 5370            | 0.19                     | 0.18      | 0.006    | 0         | -0.81        | 0.0336     | -0.85         |

| Sample <sup>1</sup> | Seq <sup>2</sup> | Trisomy | Fetal sex | Mean bam coverage (X) | Mean SNP number | Expected FF <sup>3</sup> | Fitted FF | Stdev FF | ChrY prop | ChrY Z-score | Chr21 prop | Chr21 Z-score |
|---------------------|------------------|---------|-----------|-----------------------|-----------------|--------------------------|-----------|----------|-----------|--------------|------------|---------------|
| etal10              |                  | T21     |           |                       |                 |                          |           |          |           |              | 86         |               |
| F9219_fetal15       | MiSeq            | Not-T21 | Female    | 187.6                 | 5459            | 0.25                     | 0.23      | 0.015    | 0         | -0.81        | 0.033664   | -0.92         |
| F9219_fetal20       | MiSeq            | Not-T21 | Female    | 195.8                 | 5529            | 0.3                      | 0.3       | 0.006    | 0         | -0.81        | 0.033623   | -1.04         |
| F10801_fetal4       | HiSeq            | Not-T21 | Female    | 330.4                 | 3730            | 0.078                    | 0.07      | 0.006    | 0         | -1.06        | 0.034090   | 1.14          |
| F10801_fetal5       | HiSeq            | Not-T21 | Female    | 335.3                 | 3737            | 0.094                    | 0.09      | 0        | 0         | -1.06        | 0.034069   | 1.05          |
| F10801_fetal10      | HiSeq            | Not-T21 | Female    | 357.9                 | 3764            | 0.168                    | 0.16      | 0        | 0         | -1.06        | 0.034044   | 0.95          |
| F10801_fetal15      | HiSeq            | Not-T21 | Female    | 378.3                 | 3790            | 0.23                     | 0.22      | 0.011    | 0         | -1.06        | 0.034062   | 1.03          |
| F10801_fetal20      | HiSeq            | Not-T21 | Female    | 396.6                 | 3817            | 0.284                    | 0.27      | 0.011    | 0         | -1.06        | 0.034113   | 1.23          |
| F10114_fetal4       | MiSeq            | T21     | Female    | 269.8                 | 4494            | 0.05                     | 0.04      | 0        | 1.14E-06  | 1.62         | 0.034729   | 2.24          |
| F10114_fetal5       | MiSeq            | T21     | Female    | 271                   | 4503            | 0.06                     | 0.04      | 0.012    | 1.14E-06  | 1.62         | 0.034926   | 2.82          |
| F10114_             | MiSeq            | T21     | Female    | 275.8                 | 4526            | 0.12                     | 0.12      | 0        | 1.12E-    | 1.58         | 0.0357     | 5.37          |

| Sample <sup>1</sup> | Seq <sup>2</sup> | Trisomy | Fetal sex | Mean bam coverage (X) | Mean SNP number | Expected FF <sup>3</sup> | Fitted FF | Stdev FF | ChrY prop  | ChrY Z-score | Chr21 prop | Chr21 Z-score |
|---------------------|------------------|---------|-----------|-----------------------|-----------------|--------------------------|-----------|----------|------------|--------------|------------|---------------|
| fetal10             |                  |         |           |                       |                 |                          |           |          | 06         |              | 84         |               |
| F10114_fetal15      | MiSeq            | T21     | Female    | 279.3                 | 4557            | 0.16                     | 0.17      | 0.006    | 1.10E-06   | 1.53         | 0.0365     | 7.69          |
| F10114_fetal20      | MiSeq            | T21     | Female    | 281.8                 | 4566            | 0.21                     | 0.22      | 0.01     | 1.09E-06   | 1.51         | 0.0372     | 9.66          |
| C26449_fetal4       | MiSeq            | Not-T21 | Male      | 278.5                 | 4640            | 0.07                     | 0.06      | 0.01     | 3.87E-05   | 81.74        | 0.0342     | 0.94          |
| C26449_fetal5       | MiSeq            | Not-T21 | Male      | 281.2                 | 4654            | 0.08                     | 0.08      | 0.006    | 4.75E-05   | 100.51       | 0.0343     | 1.09          |
| C26449_fetal10      | MiSeq            | Not-T21 | Male      | 293.8                 | 4723            | 0.15                     | 0.14      | 0.006    | 8.71E-05   | 184.98       | 0.0344     | 1.28          |
| C26449_fetal15      | MiSeq            | Not-T21 | Male      | 305                   | 4775            | 0.21                     | 0.19      | 0.006    | 0.00012418 | 264.09       | 0.0344     | 1.40          |
| C26449_fetal20      | MiSeq            | Not-T21 | Male      | 314.7                 | 4801            | 0.25                     | 0.25      | 0        | 0.00015708 | 334.25       | 0.0345     | 1.63          |
| C25147_fetal4       | MiSeq            | Not-T21 | Male      | 184.8                 | 4063            | 0.09                     | 0.09      | 0.006    | 6.01E-05   | 127.38       | 0.0336     | -1.03         |
| C25147_fetal5       | MiSeq            | Not-T21 | Male      | 187.5                 | 4096            | 0.1                      | 0.1       | 0.006    | 6.70E-05   | 142.10       | 0.0336     | -0.95         |
| C25147              | MiSeq            | Not-    | Male      | 200                   | 4220            | 0.18                     | 0.18      | 0.006    | 0.0001     | 251.04       | 0.0337     | -0.55         |

| Sample <sup>1</sup> | Seq <sup>2</sup> | Trisomy | Fetal sex | Mean bam coverage (X) | Mean SNP number | Expected FF <sup>3</sup> | Fitted FF | Stdev FF | ChrY prop      | ChrY Z-score | Chr21 prop   | Chr21 Z-score |
|---------------------|------------------|---------|-----------|-----------------------|-----------------|--------------------------|-----------|----------|----------------|--------------|--------------|---------------|
| _fetal10            |                  | T21     |           |                       |                 |                          |           |          | 1807           |              | 88           |               |
| C25147<br>_fetal15  | MiSeq            | Not-T21 | Male      | 211                   | 4325            | 0.24                     | 0.25      | 0        | 0.0001<br>6716 | 355.76       | 0.0338<br>23 | -0.44         |
| C25147<br>_fetal20  | MiSeq            | Not-T21 | Male      | 220.7                 | 4407            | 0.29                     | 0.29      | 0.01     | 0.0001<br>9371 | 412.39       | 0.0338<br>86 | -0.26         |
| C23944<br>_fetal4   | MiSeq            | Not-T21 | Male      | 93.79                 | 2575            | 0.12                     | 0.12      | 0.006    | 3.70E-<br>05   | 78.11        | 0.0339<br>04 | -0.20         |
| C23944<br>_fetal5   | MiSeq            | Not-T21 | Male      | 106                   | 3226            | 0.22                     | 0.23      | 0.012    | 8.36E-<br>05   | 177.51       | 0.0336<br>69 | -0.90         |
| C23944<br>_fetal10  | MiSeq            | Not-T21 | Male      | 120.7                 | 3940            | 0.31                     | 0.32      | 0.006    | 0.0001<br>3173 | 280.18       | 0.0335<br>74 | -1.18         |
| C23944<br>_fetal15  | MiSeq            | Not-T21 | Male      | 107.6                 | 3408            | 0.25                     | 0.26      | 0.006    | 7.26E-<br>05   | 154.05       | 0.0337<br>61 | -0.63         |
| C23944<br>_fetal20  | MiSeq            | Not-T21 | Male      | 111.3                 | 3613            | 0.28                     | 0.29      | 0        | 8.06E-<br>05   | 171.11       | 0.0337<br>76 | -0.58         |
| C20598<br>_fetal4   | MiSeq            | Not-T21 | Male      | 162.4                 | 3766            | 0.14                     | 0.12      | 0.006    | 6.73E-<br>05   | 142.74       | 0.0337<br>58 | -0.64         |
| C20598<br>_fetal5   | MiSeq            | Not-T21 | Male      | 166.4                 | 3841            | 0.17                     | 0.14      | 0.01     | 7.60E-<br>05   | 161.30       | 0.0337<br>88 | -0.55         |
| C20598              | MiSeq            | Not-    | Male      | 185.2                 | 4101            | 0.26                     | 0.27      | 0.006    | 0.0001         | 319.95       | 0.0339       | -0.13         |

| <b>Sample<sup>1</sup></b> | <b>Seq<sup>2</sup></b> | <b>Trisomy</b> | <b>Fetal sex</b> | <b>Mean bam coverage (X)</b> | <b>Mean SNP number</b> | <b>Expected FF<sup>3</sup></b> | <b>Fitted FF</b> | <b>Stdev FF</b> | <b>ChrY prop</b> | <b>ChrY Z-score</b> | <b>Chr21 prop</b> | <b>Chr21 Z-score</b> |
|---------------------------|------------------------|----------------|------------------|------------------------------|------------------------|--------------------------------|------------------|-----------------|------------------|---------------------|-------------------|----------------------|
| _fetal10                  |                        | T21            |                  |                              |                        |                                |                  |                 | 5037             |                     | 30                |                      |
| C20598_fetal15            | MiSeq                  | Not-T21        | Male             | 201.7                        | 4289                   | 0.33                           | 0.34             | 0.021           | 0.00020384       | 433.99              | 0.033862          | -0.33                |
| C20598_fetal20            | MiSeq                  | Not-T21        | Male             | 216.3                        | 4439                   | 0.38                           | 0.39             | 0.015           | 0.00023816       | 507.21              | 0.033883          | -0.27                |

<sup>1</sup>Sample name\_fetal XX, where XX indicates the original fastq proportion admixture (in percentage).

<sup>2</sup>Seq: Sequencing platform used.

<sup>3</sup>Calculated by fetal-specific alleles using maternal genotype information.
